# Supplementary material for: Metabolic Profile Changes of CCl4-Liver Fibrosis and Inhibitory Effects of Jiaqi Ganxian Granule
Source: PubMed Central journal article supplement (PMC6273034; doi:10.3390/molecules21060698), 2016-05-30
Supplement: molecules-21-00698-s001.pdf [file molecules-21-00698-s001.pdf]

# Supplementary Materials: Metabolic Profile Changes of CCl<sub>4</sub>-Liver Fibrosis and Inhibitory Effects of Jiaqi Ganxian Granule

Ge Wang, Zehao Li, Hao Li, Lidan Li, Jian Li and Changyuan Yu

**Table S1.** Reproducibility testing results of the UPLC-TOF-MS profiling method.

| NO. | RT (min) | <i>m/z</i> | Repeatability         |                               |                              |
|-----|----------|------------|-----------------------|-------------------------------|------------------------------|
|     |          |            | RSD (%) <sub>RT</sub> | RSD (%) <sub><i>m/z</i></sub> | RSD (%) <sub>Peak area</sub> |
| 1   | 0.95     | 132.0777   | 0.0000                | 0.0001                        | 3.57                         |
| 2   | 9.51     | 302.3050   | 0.1192                | 0.0007                        | 2.70                         |
| 3   | 9.66     | 429.2609   | 0.0747                | 0.0002                        | 3.09                         |
| 4   | 9.85     | 330.3369   | 0.0969                | 0.0002                        | 4.85                         |
| 5   | 10.17    | 839.5669   | 0.0722                | 0.0002                        | 5.00                         |
| 6   | 10.18    | 373.2743   | 0.0722                | 0.0001                        | 1.41                         |
| 7   | 10.56    | 343.2252   | 0.0499                | 0.0001                        | 1.80                         |

  

| NO. | RT (min) | <i>m/z</i> | Repeatability         |                               |                              |
|-----|----------|------------|-----------------------|-------------------------------|------------------------------|
|     |          |            | RSD (%) <sub>RT</sub> | RSD (%) <sub><i>m/z</i></sub> | RSD (%) <sub>Peak area</sub> |
| 8   | 10.75    | 568.3404   | 0.0489                | 0.0001                        | 3.35                         |
| 9   | 10.77    | 520.3398   | 0.0489                | 0.0001                        | 2.71                         |
| 10  | 11.16    | 1047.7383  | 0.0256                | 0.0002                        | 1.79                         |
| 11  | 11.21    | 572.3705   | 0.0322                | 0.0002                        | 3.37                         |
| 12  | 11.25    | 560.3708   | 0.0937                | 0.0003                        | 3.96                         |
| 13  | 11.41    | 381.2979   | 0.0388                | 0.0001                        | 1.73                         |
| 14  | 12.79    | 758.5696   | 0.0300                | 0.0001                        | 1.06                         |
| 15  | 12.79    | 780.5803   | 0.0300                | 0.0019                        | 0.99                         |
| 16  | 13.20    | 760.5880   | 0.0290                | 0.0003                        | 2.20                         |
| 17  | 13.20    | 782.5699   | 0.0290                | 0.0012                        | 2.36                         |
| 18  | 12.63    | 806.5737   | 0.0286                | 0.0001                        | 2.02                         |
| 19  | 12.63    | 828.5555   | 0.0286                | 0.0009                        | 1.54                         |
| 20  | 13.35    | 832.6090   | 0.0271                | 0.0001                        | 1.26                         |
